# Supplementary material
Source: PubMed Central journal article supplement (PMC6466815)
Supplement: ml9b00007_si_001.pdf [file ml9b00007_si_001.pdf]

## Supporting Information

### **Replacement of the thiosugar of Auranofin with iodide enhances the anticancer potency in a mouse model of ovarian cancer**

|                                                                                        |   |
|----------------------------------------------------------------------------------------|---|
| Synthesis and characterization of Et <sub>3</sub> PAul:.....                           | 2 |
| LogP determination.....                                                                | 2 |
| Apoptosis plots.....                                                                   | 3 |
| Cell death and caspase activity.....                                                   | 3 |
| Cell growth inhibition studies (Sulforhodamine B assay).....                           | 4 |
| Tolerability studies.....                                                              | 4 |
| Biodistribution studies.....                                                           | 4 |
| <i>In vivo</i> anticancer activity evaluation xenograft subcutaneous models plots..... | 7 |
| NMR stability .....                                                                    | 8 |

## Synthesis and purity of Et<sub>3</sub>PAuI ( T. Marzo et al. ACS Med. Chem. Lett. 2017, 8, 997–1001)

Auranofin has been purchased from Vinci Biochem srl

Et<sub>3</sub>PAuI was synthesized starting from commercially available Et<sub>3</sub>PAuCl. First, Et<sub>3</sub>PAuCl was treated with an excess of KI in ethanol at 25 °C. After 3 h, the mixture was dried and the resulting white solid kept at –20 °C overnight. The product was then extracted with dichloromethane, and the recombined organic phase was washed with water and dried over MgSO<sub>4</sub>. After precipitation in pentane, white crystals of Et<sub>3</sub>PAuI were collected and dried. Yield 74%. The product was characterized through <sup>31</sup>P NMR analysis with a Bruker Ultrashield 400 spectrometer (zgpg pulse sequence; <sup>31</sup>P transmitter frequency offset -120 ppm; <sup>1</sup>H transmitter frequency offset 4 ppm; spectral width 723 ppm; size of fid 65536 points; acquisition time 280 ms; magnetization recovery time 2 sec). The raw data were elaborated through Topspin® 4.0.1 software.

Purity of Et<sub>3</sub>PAuI was assessed through elemental analysis of C, N and H [calculated C: 16.30%, H: 3.42%, N: 0%, experimental: C: 16.07%, H: 3.18%, N: 0%].

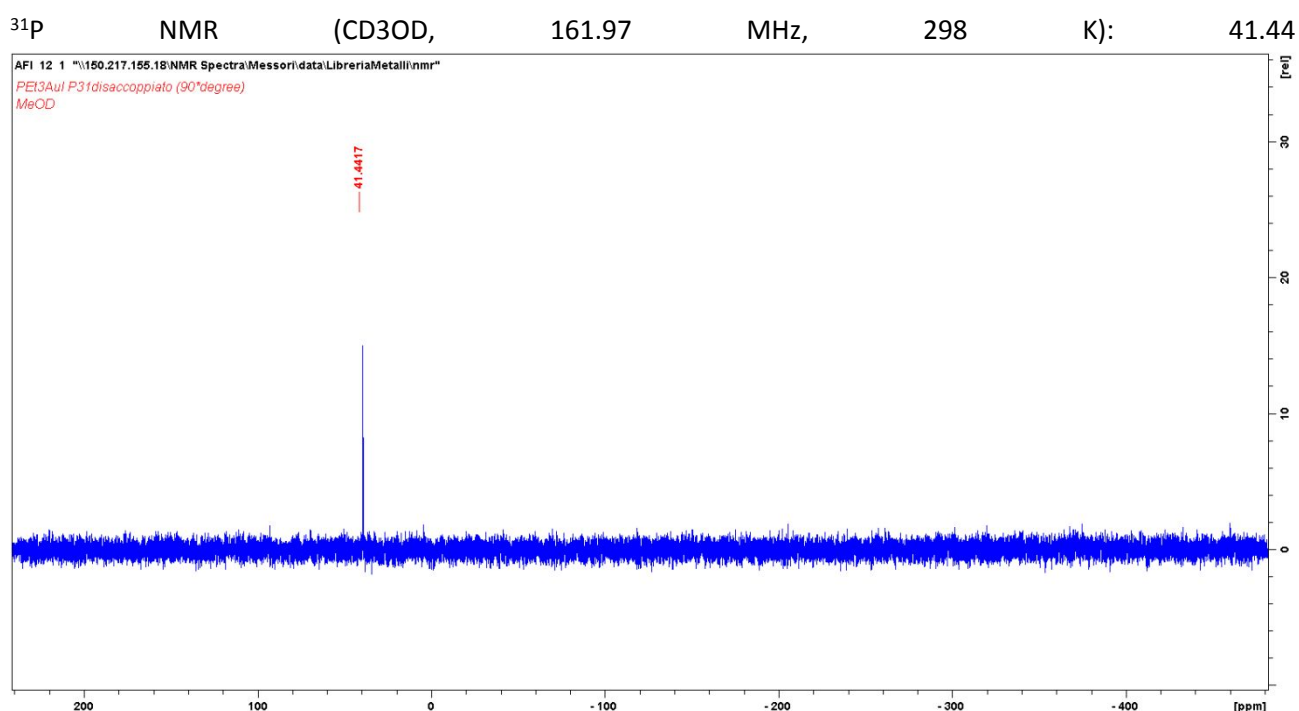

## LogP determination (T. Marzo *et al.* ACS Med. Chem. Lett. 2017, 8, 997–1001)

The octanol–water partition coefficients were determined as follows. Water (50 mL, distilled after Milli-Q purification) and n-octanol (50 mL) were shaken together for 72 h to allow saturation of both phases. Solution of the complexes were prepared in the aqueous phase and an equal volume of octanol was added. Biphasic solutions were mixed for ten minutes and then centrifuged for five minutes at 6000 rpm to allow separation. Concentration in both phases was determined by ICPAES (Au  $\lambda$ = 267.595 nm). Reported logP is defined as  $\log[\text{complex}]_{\text{oct}}/[\text{complex}]_{\text{wat}}$ . Final values were reported as the mean of three determinations.

## Apoptosis plots

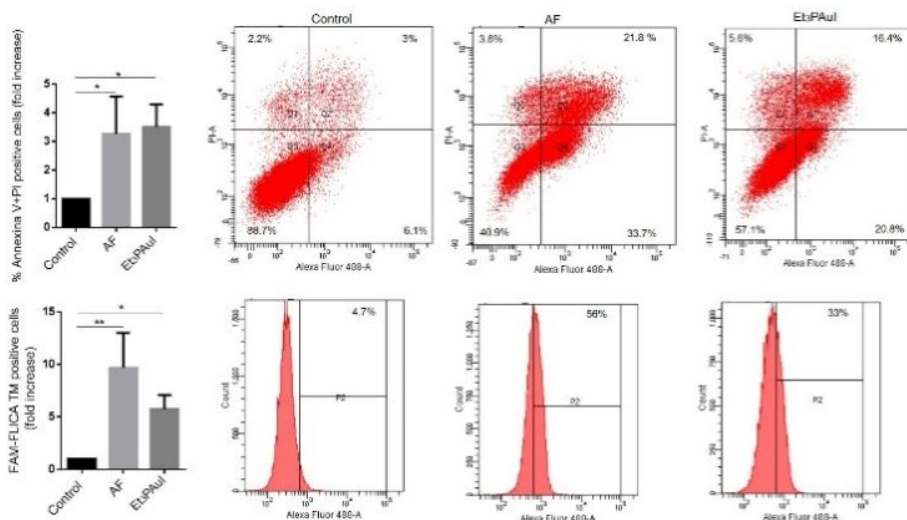

**Figure S1:** Gold compounds exert apoptosis induction in A2780 cell line. (A) Flow cytometry analysis of annexin V/propidium iodide-stained A2780 cells treated for 72 h with gold compounds at the respective IC<sub>50</sub> values. The histogram reports the mean fold increase of apoptotic/necrotic cells (A+/PI-, A+/PI+ and A-/PI+ cells) respect to control conditions. Representative dot plots were shown in the panels on the right. (B) Caspase-3 Assay of A2780 cells treated with gold compounds at the respective IC<sub>50</sub> values for 72 hours. The histogram reports the fold increase of FAM-FLICA™ positive cells (P2) respect to control cells. Representative dot plots were shown in the panels on the right. Four independent experiments were performed for both assays. The statistical analysis was carried out using one-way ANOVA test followed by Tuckey's multiple comparisons test using Graphpad Prism v 6.0 (\*p<0.05, \*\*p<0.01).

### Assessment of cell death by flow cytometry

Cell death was analysed by TACS Annexin V/PI Kit (Trevigen) according to the manufacturer's instructions. Briefly, control, Auranofin, and Et<sub>3</sub>PAul A2780-treated cells for 72 h with 72 h-exposure IC<sub>50</sub>, were trypsinized, washed with PBS and resuspended in staining solution for 15 min in the dark. Cells were analysed by FACSCanto flow cytometer (BD Biosciences). Gated cells were plotted on a dot-plot showing Annexin-V staining and propidium iodide (PI) staining. Percentage of apoptotic/necrotic cells was determined adding Annexin V positive (early apoptotic) cells to Annexin/PI positive ones (late apoptotic) and to PI positive cells (necrotic cells).

### Assessment of caspase activity by flow cytometry

For Caspase-3 activity determination control, Auranofin and Et<sub>3</sub>PAul A2780-treated cells for 72 h with 72 h-exposure IC<sub>50</sub>, were trypsinized, washed with PBS and resuspended in FAM-FLICA™ Caspases solution (Caspase FLICA kit FAM-DEVD-FMK, ImmunoChemistry Technologies) for 1 h at 37°C, following the manufacturer's instruction. Cells were washed with PBS and analysed by FACSCanto flow cytometer (BD Biosciences).

### **Cell growth inhibition studies (Sulforhodamine B assay).**

The cytotoxic effects of the complexes were evaluated on the growth of A2780 cell line according to the procedure described by Skehan et al. (Skehan, P.; Stroeng, R.; Scudiero, D.; Monks, A.; McMahon, J.; Vistica, D.; Warren, J. T.; Bokesch, H.; Kenney, S.; Boyd, M. R. *J. Natl. Cancer Inst.* 1990, 82, 1107–1112). Both compounds were initially diluted in DMSO as stock solutions (20 mM), further dilutions have been performed in PBS (0.5% DMSO present at the higher tested concentration).

Exponentially growing cells were seeded in 96-well microplates at a density of  $5 \times 10^3$  cell/well. After cell inoculation, the microtiter plates were incubated under standard culture conditions (37°C, 5% CO<sub>2</sub>, 95% air and 100% relative humidity) for 24 h prior to the addition of study compounds. After 24 h, the medium was removed and replaced with fresh medium containing drug concentrations ranging from 0.003 to 100  $\mu$ M for a continuous exposure of 24 and 72 h for both study compounds.

For comparison purposes the cytotoxicity effects of cisplatin measured in the same experimental conditions were also determined.

According to the procedure the assay was terminated by the addition of cold trichloroacetic acid (TCA). Cells were fixed *in situ* by 10% TCA and stained by sulforhodamine B (SRB) solution at 0.4% (w/v) in 1% acetic acid. After staining, unbound dye was removed by washing five times with 1% acetic acid and the plates were air dried. Bound stain was subsequently solubilized with 10 mM tris base, and the absorbance was read on an automated plate reader at a wavelength of 540 nm.

The IC<sub>50</sub> drug concentration resulting in a 50% reduction in the net protein content (as measured by SRB staining) in drug treated cells as compared to untreated control cells was determined after 72 h of drug exposure.

### **Tolerability studies**

Nude mice were randomly grouped according to their body weight with four mice per test substance, which was administered intraperitoneally using two different doses (20 mg/kg and 40 mg/kg). The complexes have been solubilized in DMSO and then diluted in bidistilled water with 5% DMSO present in the final solution. Only one administration was performed, followed by a three weeks observation period; in this time, we monitored daily possible signs of toxicity including weight loss, mobility reduction, dehydration, hunched posture, ruffled fur, and loss of appetite or lethargy. Animals were euthanized if their body weight loss exceeded 15% within the first 24 h after treatment or 20% at any other point in the study.

### **Biodistribution studies**

For the assessment of biodistribution of Auranofin, Et<sub>3</sub>PAuI and, nude mice (female 5 weeks old) were randomly grouped according to their body weight with three mice per test substance, which was administered with intraperitoneal injection using a single dose (10 mg/kg). Mice from each group were anesthetized, bled, and sacrificed, and organs dissected (spleen, liver, kidney, heart) at 24 hours. After blood collection, tissues were weighed and solubilized, and the amount of gold in each tissue was determined through ICP-OES analysis after mineralisation with HNO<sub>3</sub>. The determination of gold concentration in the blood or in the organs was performed by a Varian 720-ES Inductively Coupled Plasma Atomic Emission Spectrometer (ICP-AES) equipped with a CETAC U5000 AT+ ultrasonic nebulizer, in order to increase the method sensitivity. Before the analysis, samples were weighed in PE vials and digested in a

thermo-reactor at 80 °C for 24 h with 2 mL of HNO<sub>3</sub> (35 % suprapure grade) 0.5 mL of H<sub>2</sub>O<sub>2</sub> suprapure grade. After digestion, the samples were diluted to 6 mL with ultrapure water ( $\leq 18 \text{ M}\Omega$ ). 5.0 mL of each sample were spiked with 1 ppm of Ge used as an internal standard and analysed. Calibration standards were prepared by gravimetric serial dilution from a commercial standard solution of Au at 1000 mg L<sup>-1</sup>. The wavelength used for Au determination was 267.594 nm whereas for Ge the line at 209.426 nm was used. The operating conditions were optimized to obtain maximum signal intensity, and between each sample, a rinse solution of HNO<sub>3</sub> (35 % suprapure grade) was used in order to avoid any “memory effect”.

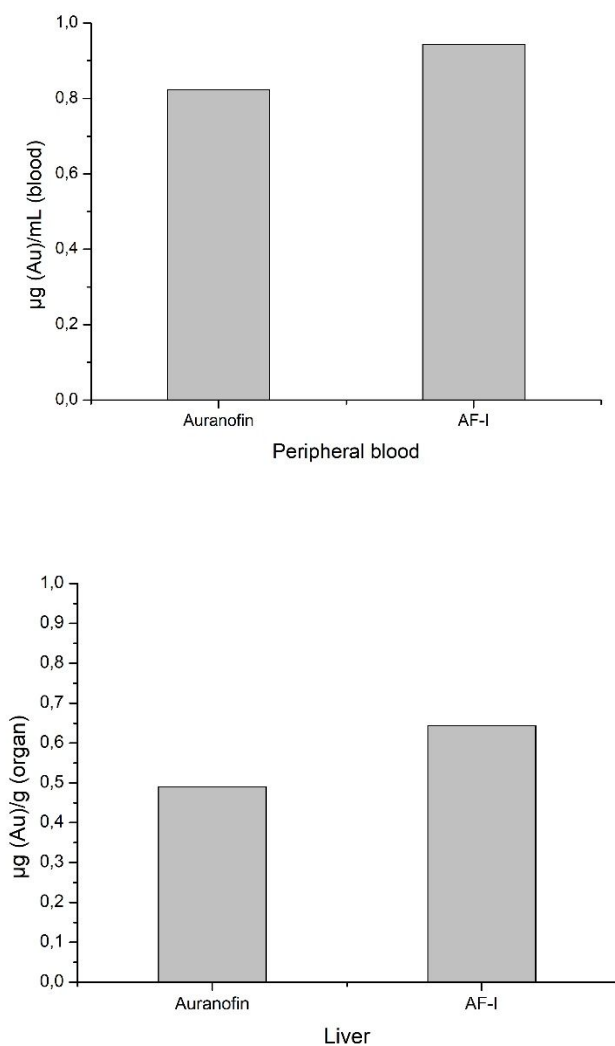

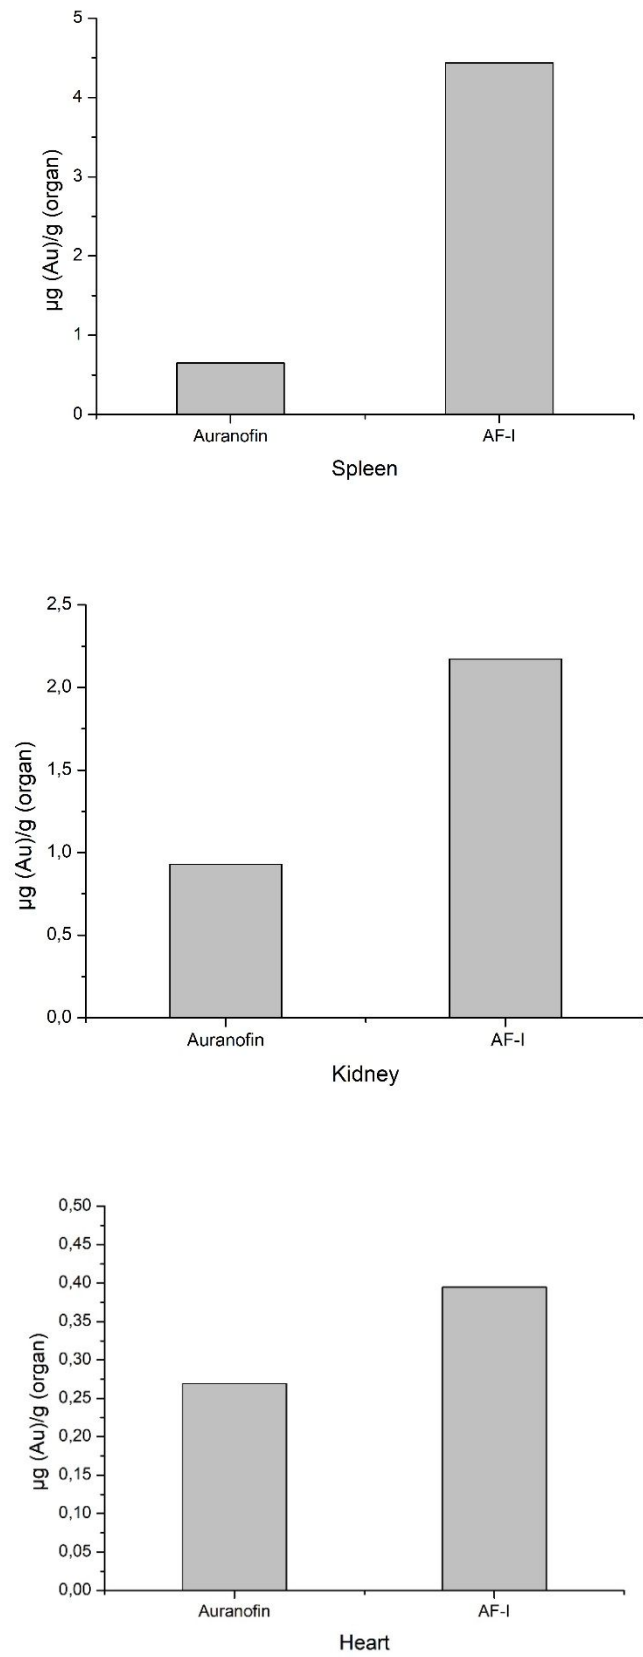

**Figure S2:** plots of biodistribution pilot study for Auranofin and Et<sub>3</sub>PAuI (AF-I)

***In vivo* anticancer activity**

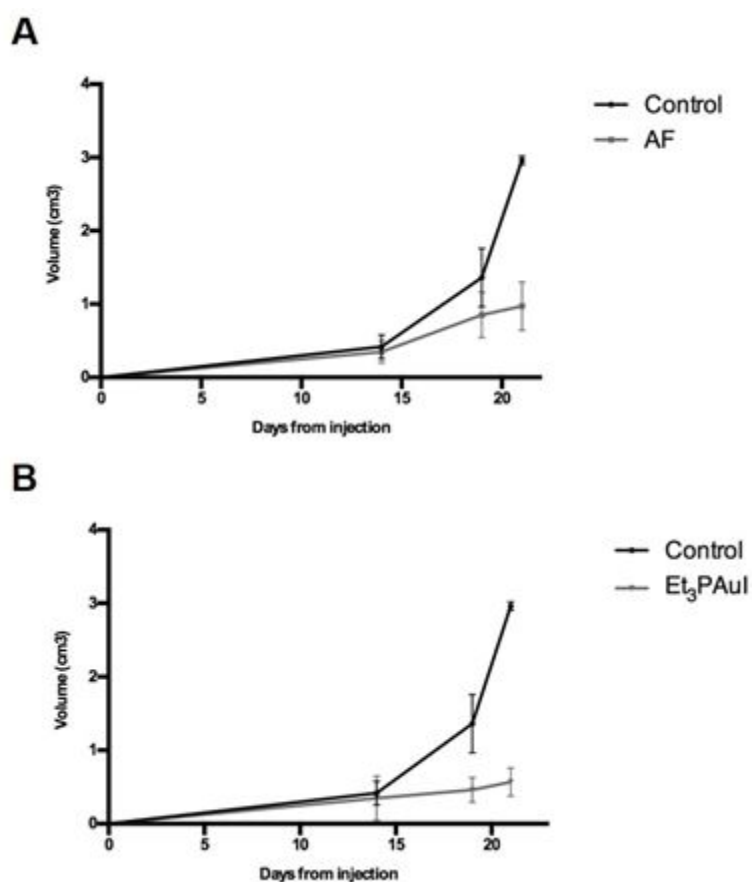

**Figure S3 A-B:** *In vivo* anticancer activity evaluation of gold compounds in a xenograft subcutaneous (sc) model of ovarian cancer cell line. (A, B) Time course of tumor growth in control, AF, and Et<sub>3</sub>PAul treated mice (4 animals per group), injected with A2780 cells sc. Treatments started when the volume of the masses reached 60 mm<sup>3</sup> (after 7 days from cells injection); the administration was performed by intraperitoneal injections (three times a week for two weeks of treatment) of AF and Et<sub>3</sub>PAul compounds (15 mg/kg). Data are reported as the mean  $\pm$  SD

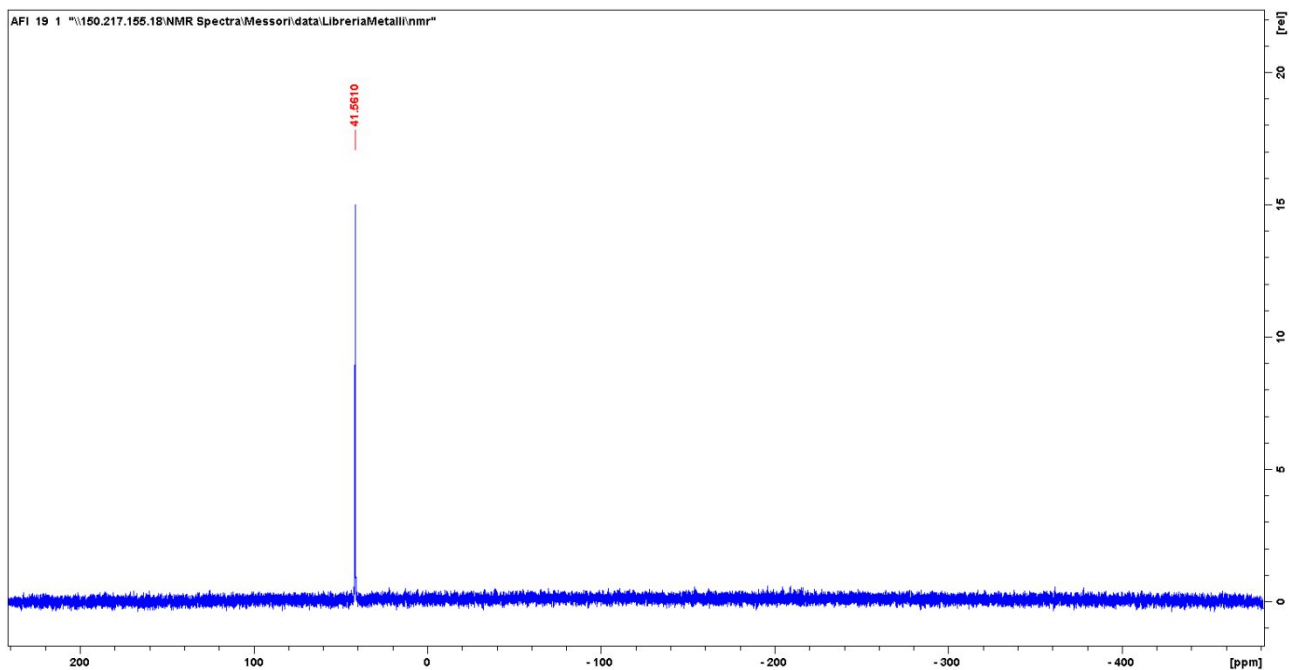

**Figure S4:** Spectrum recorded after incubation (24h) of Au(PEt<sub>3</sub>)I (3.8 mg) in 250μL MeOD + 250μL NaCl 100mM. Signal detected at 41.56 ppm.
